# Supplementary material for: Memory or acclimation of water stress in pea rely on root system's plasticity and plant's ionome modulation
Source: Front Plant Sci. 2023 Jan 25;13:1089720. doi: 10.3389/fpls.2022.1089720 (PMC9905705; doi:10.3389/fpls.2022.1089720)
Supplement: Supplementary file 2 [file Table_1.xlsx]

## Sheet: Supplementary Table 1
Supplementary Table S1 : Soil chemical characteristics
		Result	Unit	Method
Calcium status	Water pH	7.9	-	NF ISO 10 390
	KCl pH	7.2		NF ISO 10 390
	total of carbonate	58	0/00	NF ISO 10 693
	active limestone	23	0/00	NFX 31-106
Organic status	oragnic mater	101.1	0/00	Calcination at 550°C
	total of organic carbon	34.8	0/00	NF ISO 14 325
	organic mater	60.1	0/00	NF ISO 14 235
	total of azote	3.31	0/00	NF ISO 13 878 (DUMAS method)
	Rate C/N	10.5		NF ISO 13 878
Available phosphore	Soluble phosphoshore (P2O5)	0.0031	0/00
	Olsen phosphore (P2O5)	0.07	0/00	NF ISO 11263
Complex CEC	CEC Metson	277	me/Kg	NFX 31-130
	CEC Cobalti-hexamine	319	me/Kg	NF ISO 23470 with colorimetric dosing
	exchangeable K2O	1.04	0/00	NFX 31-108 ICP AES
	exchangeable MgO	0.39	0/00	NFX 31-108 ICP AES
	exchangeable CaO	14.5	0/00	NFX 31-108 ICP AES
	exchangeable Na2O	0.041	0/00	NFX 31-108 ICP AES
	exchangeable K2O (cobalti extract)	0.15	0/00	NF ISO 23470
	exchangeabe MgO (cobalti extract)	0.2	0/00	NF ISO 23470
	exchangeable CaO (cobalti extract)	8.38	0/00	NF ISO 23470
	exchangeable aluminium (cobalti extract)	<5	mg/kg	NF ISO 23470
	H+ proton	<5	mg/Kg	NF ISO 23470
	exchangeable aluminium	<5	mg/Kg	molar KCl ICP-AES
trace elements	DTPA Copper	1.1	mg/Kg	NFX 31-121 ICP AES
	DTPA Iron	25.4	mg/Kg	NFX 31-121 ICP AES
	DTPA Manganese	10.5	mg/kg	NFX 31-121 ICP AES
	DTPA Zinc	1.9	mg/kg	NFX 31-121 ICP AES
Other	extractable sulfur (KH2PO4)	27	mg/kg	Extr. KH2PO4 + ICP
	N-NH4 on dry soil	4.7	mg/kg	NF ISO 14256-2 (ext KCl M)
	N-NO3 on dry soil	6.7	mg/kg	NF ISO 14256-2 (ext KCl M)
Total element	Total Phosphore (P)	1.38	0/00	NFX 31-147 ICP-MS
	Total Potassium (K)	13.9	0/00	NFX 31-147 ICP-MS

## Sheet: Supplementary Table 2
Supplementary Table S1 : Measured ecophysiological variable according to the water stress considered and control.
RESULTS OF STATISTICAL ANALYSES									Conditions
mean ± sd	Mean and standard deviation of sample
									11 samplings:
									t0_WWc	Well watered at t0
									t1_WWc	Well watered at t1
Variables									t2_WWc	Well watered at t2
									t3_WWc	Well watered at t3
StemA		Rate of Stem area (cm²)							t1_WS1	Vegetative stress at t1
LeaveA		Rate of Leave area (cm²)							t2_WS1	Recovery period at t2
StemDW		Rate of Stem dry weight (g)							t3_WS1	Vegetative Transient stress at t3
LeaveDW		Rate of Stem Leave dry weight (g)							t3_WS1+2	Recurrent stress at t3
RootDW		Rate of Stem root dry weight (g)							t2_WSc	Continuous stress at t2
NoduleDW		Rate of Nodule dry weight (g)							t3_WSc	Continuous stress at t3
ShootDW		Rate of Shoot dry weight (g)							t3_WS2	Reproductive Transient stress at t3
RootSystDW		Rate of Root system dry weight (g)
PlantDW		Rate of Plant dry weight (g)							5 plant tissues:
Wqty		Rate of Water quantity (g)
TaprootLEN		Rate of Taproot length (cm)							Plant
LateralRootNb		Rate of Latera root number							Leaves
Taproot NoduleNb		Rate of Nodule number on taproot							Stem
LateralRoot NoduleNb		Rate of Nodule number on lateral root							Root
NoduleNb		Rate of Total nodule number							Nodule
RshootRootSystem		Rate of Shoot on Rootsystem
Rnodule		Rate of Nodule on Root dry weight
SLA		Specific Leaf Area
RUE		Radiation Use Efficiency
Harvest_Treament	StemA	LeaveA	StemDW	LeaveDW	RootDW	NoduleDW	ShootDW	RootSystDW	PlantDW	Wqty	TaprootLEN	LateralRootNb	Taproot NoduleNb	LateralRoot NoduleNb	NoduleNb	RShootRootSystem	RNodule	SLA	RUE
t0_WWc	2.39 ± 0.08	27.06 ± 3.7	0.04 ± 0.002	0.11 ± 0.01	0.11 ± 0.01	0	0.15 ± 0.01	0.11 ± 0.01	0.26 ± 0.02	371.5 ± 62.6	20.47 ± 1.07	63.50 ± 6.6	3.25 ± 3.2	0	3.25 ± 3.2	1.37 ± 0.2	NA	231.67 ± 20.1	NA
t1_WWc	9.80 ± 0.7	103.01 ± 15.1	0.24 ± 0.02	0.72 ± 0.1	0.23 ± 0.04	0.04 ± 0.01	0.96 ± 0.1	0.277 ± 0.05	1.23 ± 0.2	1894.25 ± 1143.4	19.30 ± 7.8	48.75 ± 18.7	9.75 ± 9.2	420.62 ± 231.3	430.37 ± 234.9	3.58 ± 0.2	0.16 ± 0.02	125.08 ± 12.3	571.38 ± 110.0
t1_WS1+2	8.627 ± 1.0	93.57 ± 6.4	0.22 ± 0.03	0.64 ± 0.08	0.26 ± 0.04	0.05 ± 0.06	0.86 ± 0.1	0.31 ± 0.06	1.17 ± 0.1	1891.50 ± 1516.1	21.72 ± 3.6	57.62 ± 12.7	11.12 ± 5.8	267.12 ± 182.5	278.25 ± 181.22	2.85 ± 0.3	0.08 ± 0.04	127.18 ± 14.6	500.49 ± 52.2
t2_WWc	33.75 ± 1.8	333.55 ± 19.7	1.03 ± 0.01	3.03 ± 0.2	0.40 ± 0.03	0.19 ± 0.08	4.14 ± 0.2	0.58 ± 0.07	4.73 ± 0.2	6220.25 ± 212.8	20.35 ± 5.4	60.75 ± 13.2	14.75 ± 19.1	319.25 ± 81.0	334.00 ± 97.6	7.09 ± 0.9	0.47 ± 0.2	100.87 ± 8.8	1745.0 ± 171.28
t2_WS1+2	22.13 ± 1.5	221.15 ± 7.1	0.74 ± 0.07	2.17 ± 0.2	0.34 ± 0.03	0.15 ± 0.06	2.95 ± 0.3	0.49 ± 0.08	3.44 ± 0.3	4703.25 ± 1997.7	21.37 ± 2.4	55.75 ± 13.7	6.50 ± 0.6	442.50 ± 125.7	449.00 ± 131.1	6.17 ± 1.3	0.43 ± 0.1	85.26 ± 12.9	961.22 ± 61.5
t2_WSc	23.70 ± 2.7	222.54 ± 3.0	0.87 ± 0.1	2.32 ± 0.2	0.47 ± 0.04	0.12 ± 0.01	3.30 ± 0.04	0.52 ± 0.02	3.82 ± 0.4	5267.33 ± 150.4	28.97 ± 6.4	65.75 ± 6.9	2.75 ± 1.7	398.00 ± 79.4	400.75 ± 79.3	11.8 ± 2.2	0.68 ± 0.2	46.70 ± 10.6	974.49 ± 44.6
t3_WWc	59.83 ± 23.0	465.39 ± 134.6	2.41 ± 0.6	6.16 ± 1.2	0.61 ± 0.1	0.52 ± 0.2	11.63 ± 2.2	1.13 ± 0.3	12.76 ± 2.3	6419.40 ± 617.5	20.90 ± 3.7	58.50 ± 10.7	49.60 ± 5.1	793.80 ± 615.1	843.40 ± 663.7	11.74 ± 1.9	0.73 ± 0.2	43.16 ± 24.4	1238.06 ± 728.9
t3_WS1	32.85 ± 4.6	322.66 ± 60.8	1.61 ± 0.2	4.24 ± 0.8	0.44 ± 0.08	0.36 ± 0.2	8.53 ± 1.3	0.80 ± 0.2	9.33 ± 1.4	5499.2 ± 454.17	20.27 ± 1.9	50.75 ± 9.8	23.75 ± 42.2	322.25 ± 261.3	270.5 ± 195.0	10.48 ± 0.1	0.33 ± 0.1	13.66 ± 3.3	823.04 ± 477.9
t3_WS1+2	32.85 ± 4.7	332.67 ± 60.8	1.61 ± 0.2	4.24 ± 0.8	0.44 ± 0.08	0.36 ± 0.2	8.53 ± 1.3	0.80 ± 0.2	9.33 ± 1.4	5499.20 ± 454.2	20.27 ± 1.9	50.75 ± 9.9	23.75 ± 4.2	322.25 ± 261.3	270.50 ± 195.0	62.4 ± 1.0	0.30 ± 0.03	72.92 ± 18.0	22.98 ± 7.6
t3_WSc	20.11 ± 0.7	202.18 ± 11.6	0.94 ± 0.05	2.52 ± 0.2	0.38 ± 0.05	0.14 ± 0.04	5.44 ± 0.5	0.52 ± 0.08	5.96 ± 0.6	3629.00 ± 420.0	19.85 ± 6.3	48.75 ± 9.0	19.00 ± 5.5	511.00 ± 121.4	530.00 ± 116.2	10.66 ± 0.7	0.35 ± 0.08	15.98 ± 6.9	30.27 ± 9.34
t3_WS2	36.94 ± 5.4	325.55 ± 64.7	1.55 ± 0.2	3.87 ± 0.7	0.53 ± 0.08	0.19 ± 0.1	7.23 ± 0.8	0.73± 0.2	7.96 ± 1.0	4653.40 ± 400.0	23.35 ± 15.7	48.50 ± 32.5	29.00 ± 35.8	536.20 ± 258.0	565.20 ± 278.4	0.21 ± 1.0	0.27 ± 0.08	27.84 ± 16.3	59.13 ± 16.7

## Sheet: Supplementary Table 3
Supplementary Table S3 : Element concentration (ppm) in plant according to the water stress considered and control.
RESULTS OF STATISTICAL ANALYSES									Conditions
mean ± sd and letter	Mean and standard deviation of sample and statistical difference compared with WW plants (letter)
									10 samplings:
									t1_WWc	Well watered at t1
Variables									t2_WWc	Well watered at t2
									t3_WWc	Well watered at t3
[N]	Nitrogen concentration								t1_WS1	Vegetative stress at t1
[Ca]	Calcium concentration								t2_WS1	Recovery period at t2
[Mg]	Magnesium concentration								t3_WS1	Vegetative Transient stress at t3
[B]	Bore concentration								t3_WS1+2	Recurrent stress at t3
[K]	Potassium concentration								t2_WSc	Continuous stress at t2
[P]	Phophorus concentration								t3_WSc	Continuous stress at t3
[Na]	Sodium concentration								t3_WS2	Reproductive Transient stress at t3
[Zn]	Zinc concentration
[Fe]	Iron concentration								5 plant tissues:
[Mn]	Manganese concentration
[V]	Vanadium concentration								Plant
[Cu]	Copper concentration								Leaves
[S]	Sulphur concentration								Stem
[Co]	Cobalt concentration								Root
[Mo]	Molybdenum concentration								Nodule
[Ni]	Nickel concentration
	Harvest_Treament	[N]	[C]	[Na]	[Mo]	[B]	[Mg]	[P]	[S]	[Ca]	[V]	[Mn]	[Fe]	[Co]	[Ni]	[Cu]	[Zn]	[K]
PLANT	t1_WWc	27877.63 ± 3408.4	437712.01 ± 10163.9	515.71 ± 32.9	5.96 ± 0.7	19.04 ± 0.9	1597.15 ± 89.2	2744.55 ± 144.6	2967.64 ± 288.5	15745.91 ± 542.6	2.02 ± 0.5	33.83 ± 4.4	415.78 ± 104.3	0.41 ± 0.08	1.26 ± 0.2	16.82 ± 0.9	57.98 ± 11.5	25064.22 ± 2008.3
	t1_WS1+2	22641.28 ± 767.0	454664.18 ± 2183.8	902.83 ± 218.5	5.73 ± 1.4	19.45 ± 2.6	1937.21 ± 139.5	2797.18 ± 380.9	3052.19 ± 265.2	15640.23 ± 1687.6	4.57 ± 0.9	55.61 ± 3.9	1069.61 ± 283.4	0.59 ± 0.08	2.52 ± 0.7	14.31 ± 2.4	58.29 ± 6.6	26266.68 ± 2678.3
	t2_WWc	29678.47 ± 3682.2	459622.78 ± 4577.9	383.93 ± 138.9	3.23 ± 0.6	17.87 ± 1.7	1101.13 ± 70.4	2505.50 ± 391.6	1559.33 ± 212.4	11442.77 ± 658.4	1.42 ± 0.6	28.38 ± 7.3	313.50 ± 117.8	0.27 ± 0.1	1.71 ± 2.07	13.05 ± 5.1	37.18 ± 9.5	17292.79 ± 1580.7
	t2_WS1+2	26744.55 ± 2616.5	458422.11 ± 3606.0	333.37 ± 44.8	4.22 ± 0.8	17.35 ± 1.0	1122.45 ± 94.87	2305.35 ± 271.9	1861.72 ± 242.9	12370.02 ± 527.5	1.48 ± 0.5	39.46 ± 3.3	339.61 ± 114.9	0.39 ± 0.06	1.01 ± 0.3	9.50 ± 1.9	35.14 ± 8.2	18139.17 ± 1752.6
	t2_WSc	26564.96 ± 3874.7	451085.61 ± 7978.2	530.42 ± 104.3	2.72 ± 0.4	16.07 ± 0.8	1079.36 ± 106.7	1706.78 ± 42.3	1365.78 ± 156.0	11479.74 ± 419.9	2.01 ± 1.01	36.07 ± 5.57	434.89 ± 211.3	0.33 ± 0.1	1.21 ± 0.2	19.11 ± 10.6	46.11 ± 12.9	15731.61 ± 1040.8
	t3_WWc	19893.50 ± 3004.7	457951.01 ± 6254.3	208.85 ± 35.0	1.77 ± 0.4	13.14 ± 2.3	639.13 ± 127.3	1365.93 ± 185.5	886.02 ± 131.1	9866.99 ±1521.03	1.42 ± 0.5	19.84 ± 2.1	315.60 ± 118.2	0.21 ± 0.04	0.75 ± 0.2	8.33 ± 2.3	23.75 ± 2.7	9441.41 ± 2136.3
	t3_WS1	19398.55 ± 2969.8	449268.23 ± 10771.0	239.04 ± 32.9	1.70 ± 0.3	11.90 ± 0.8	542.2 ± 42.4	1038.2 ± 61.6	935.54 ± 80.2	9057.5 ± 578.8	2.44 ± 0.7	25.9 ± 5.9	563.08 ± 180.0	0.32 ± 0.09	0.96 ± 0.2	6.64 ± 1.8	20.10 ± 4.9	8487.7 ± 458.1
	t3_WS1+2	17268.65 ± 2890.9	457377.96 ± 2650.9	220.39 ± 68.9	2.67 ± 0.9	14.69 ± 1.9	711.84 ± 161.2	1402.70 ± 363.1	1264.88 ± 293.4	10689.12 ± 2301.6	3.77 ± 1.5	35.87 ± 10.1	884.24 ± 396.6	0.43 ± 0.2	1.74 ± 0.7	9.49 ± 6.1	30.03 ± 9.5	10586.89 ± 3131.7
	t3_WSc	15015.36 ± 824.1	453406.66 ± 1723.3	208.76 ± 141.8	1.46 ± 0.2	15.01 ± 1.1	653.10 ± 174.5	783.85 ± 93.5	940.69 ± 228.0	12065.80 ± 1497.0	1.84 ± 0.5	34.75 ± 7.9	444.80 ± 104.5	0.27 ± 0.08	N	9.74 ± 4.2	31.05 ± 5.3	9846.05 ± 993.9
	t3_WS2	22156.80 ± 2880.3	457049.05 ± 10547.8	256.89 ± 99.7	1.59± 0.4	14.48 ± 0.7	685.14 ± 110.2	1437.59 ± 365.1	1091.08 ± 158.2	10238.40 ± 749.6	1.73 ± 0.7	23.10 ± 2.0	398.29 ± 174.5	0.20 ± 0.05	0.84 ± 0.1	5.86 ± 0.7	22.59 ± 2.8	11260.46 ± 3180.3
LEAVES	t1_WWc	27577.95 ± 4411.9	449553.62 ± 3087.8	202.50 ± 7.2	1.27 ± 0.08	22.90 ± 1.6	1528.21 ± 35.0	2884.68 ± 228.2	2301.27 ± 165.4	17730.19 ± 220.8	0.29 ± 0.02	32.82 ± 3.6	142.68 ± 6.3	0.09 ± 0.02	0.58 ± 0.02	8.39 ± 4.9	35.70 ± 20.4	21437.41 ± 2233.4
	t1_WS1+2	26922.51 ± 2981.5	447297.90 ± 2036.3	212.44 ± 48.0	1.24 ± 0.3	24.64 ± 4.5	1725.40 ± 354.1	2993.44 ± 643.9	2047.16 ± 339.4	19784.38 ± 3349.2	0.45 ± 0.4	53.25 ± 11.0	223.58 ± 166.8	0.13 ± 0.07	1.08 ± 0.7	7.58 ± 1.6	35.23 ± 6.5	22283.14 ± 3337.5
	t2_WWc	34715.09 ± 2354.2	464029.72 ± 2033.4	146.01 ± 4.9	0.93 ± 0.2	21.26 ± 0.9	1057.01 ± 38.6	2847.65 ± 154.0	1622.39 ± 167.2	11296.24 ± 670.2	0.06 ± 0.02	24.18 ± 1.8	59.12 ± 3.4	0.04 ± 0.001	0.31 ± 0.04	5.11 ± 1.4	17.94 ± 0.3	17289.13 ± 558.2
	t2_WS1+2	28607.85 ± 4098.0	462222.86 ± 3842.9	138.90 ± 10.1	1.16 ± 0.1	19.81 ± 0.4	968.88 ± 67.6	2421.44 ± 394.0	1629.90 ± 90.15	12405.31 ± 667.1	0.09 ± 0.04	35.05 ± 3.1	64.25 ± 3.7	0.13 ± 0.01	0.39 ± 0.06	4.59 ± 0.07	18.39 ± 2.1	15274.93 ± 698.4
	t2_WSc	26964.08 ± 1978.2	461646.53 ± 2317.7	124.49 ± 19.5	0.85 ± 0.04	18.25 ± 1.1	873.77 ± 61.7	1860.15 ± 43.4	1225.86 ± 75.2	12182.43 ± 346.6	0.05 ± 0.02	34.98 ± 3.9	68.11 ± 9.08	0.06 ± 0.001	0.49 ± 0.1	16.57 ± 13.7	29.12 ± 10.3	13797.28 ± 555.2
	t3_WWc	21208.29 ± 4029.2	459508.93 ± 3643.8	98.26 ± 13.13	0.40 ± 0.13	15.14 ± 3.3	500.70 ± 125.3	1258.53 ± 207.9	969.87 ± 162.9	10216.35 ± 2015.5	0.09 ± 0.01	17.00 ± 4.1	43.11 ± 6.1	0.04 ± 0001	0.43 ± 0.2	5.83 ± 3.3	11.00 ± 2.9	9899.50 ± 2298.3
	t3_WS1	17970.73 ± 1781.9	459873.1 ± 2010.8	82.10 ± 11.7	0.39 ± 0.1	14.01 ± 1.01	449.95 ± 35.9	979.02 ± 76.1	1021.94 ± 119.8	9384.44 ± 820.1	0.11 ± 0.04	20.68 ± 1.5	43.40 ± 10.5	0.09 ± 0.01	0.23 ± 0.09	3.72 ± 1.1	7.85 ± 1.5	9001.16 ± 488.6
	t3_WS1+2	17115.38 ± 3499.2	461516.47 ± 3208.60	80.36 ± 9.2	0.56 ± 0.2	17.24 ± 2.9	589.88 ± 122.9	1153.97 ± 353.9	1214.70 ± 252.8	11853.46 ± 3064.0	0.24 ± 0.03	29.33 ± 8.6	97.91 ± 11.7	0.12 ± 0.02	0.49 ± 0.2	5.46 ± 3.9	15.78 ± 1.9	9257.57 ± 2507.8
	t3_WSc	14470.68 ± 2059.5	453136.11 ± 3007.3	67.97 ± 7.2	0.22 ± 0.02	16.90 ± 1.8	489.32 ± 76.9	685.10 ± 104.8	841.53 ± 59.5	13451.54 ± 2284.9	0.13 ± 0.01	36.90 ± 3.9	68.40 ± 5.57	0.08 ± 0.01	0.35 ± 0.1	6.84 ± 4.8	15.04 ± 4.5	7918.61 ± 573.0
	t3_WS2	20643.21 ± 3265.0	461632.96 ± 2910.0	98.58 ± 4.3	0.50 ± 0.2	16.82 ± 0.8	580.34 ± 100.2	1303.03 ± 322.9	1145.01 ± 197.5	11325.44 ± 897.4	0.17 ± 0.06	21.74 ± 3.3	70.91 ± 20.1	0.06 ± 0.01	0.25 ± 0.09	3.88 ± 1.21	11.89 ± 2.5	10321.77 ± 2578.4
STEM	t1_WWc	17922.25 ± 10182.9	426188.04 ± 14899.2	355.91 ± 16.9	18.48 ± 0.9	12.14 ± 0.7	1482.19 ± 90.3	2044.27 ± 115.4	2405.10 ± 185.8	17662.61 ± 1201.8	0.36 ± 0.06	16.20 ± 1.9	156.77 ± 20.6	0.08 ± 0.01	0.92 ± 0.4	5.68 ± 0.6	24.71 ± 2.5	37676.56 ± 3320.0
	t1_WS1+2	6434.09 ± 3034.5	457051.12 ± 3553.77	383.45 ± 25.84	13.43 ± 1.01	12.24 ± 0.2	1549.07 ± 28.5	2113.43 ± 83.1	2061.51 ± 72.9	17053.06 ± 1401.0	0.27 ± 0.04	20.20 ± 0.2	137.49 ± 29.3	0.08 ± 0.01	1.40 ± 0.7	7.23 ± 1.9	35.78 ± 3.6	36993.55 ± 1797.5
	t2_WWc	15746.75 ± 2116.8	448841.67 ± 1699.1	428.67 ± 82.9	8.01 ± 2.4	10.98 ± 0.7	1324.76 ± 116.9	2116.28 ± 268.9	931.07 ± 205.4	12745.24 ± 745.7	0.11 ± 0.03	13.64 ± 1.6	47.45 ± 7.2	0.04 ± 0.01	0.53 ± 0.3	17.23 ± 15.5	35.02 ± 9.9	24804.86 ± 2767.0
	t2_WS1+2	14089.17 ± 1472.9	442719.17 ± 7016.7	399.60 ± 19.5	10.10 ± 2.4	10.24 ± 0.5	1261.71 ± 61.9	1671.52 ± 186.3	1214.97 ± 153.5	13254.77 ± 588.3	0.10 ± 0.03	16.25 ± 1.6	44.38 ± 6.3	0.10 ± 0.02	0.57 ± 0.1	7.50 ± 1.3	28.35 ± 2.4	24236.80 ± 2694.6
	t2_WSc	13248.39 ± 1836.4	434765.55 ± 22077.3	331.66 ± 30.1	6.11 ± 1.0	10.39 ± 0.6	1065.94 ± 151.5	1131.75 ± 75.4	755.19 ± 96.1	11731.02 ± 1245.8	0.06 ± 0.01	13.73 ± 1.7	40.49 ± 2.9	0.05 ± 0.001	0.88 ± 0.2	4.87 ± 1.0	28.59 ± 3.3	19414.90 ± 1363.2
	t3_WWc	11432.48 ± 2193.3	449439.92 ± 8508.2	453.25 ± 177.5	4.31 ± 1.5	8.75 ± 0.7	1010.10 ± 205.3	1297.25 ± 125.2	444.09 ± 67.9	9089.84 ± 1184.6	0.08 ± 0.03	7.62 ± 1.6	27.79 ± 5.8	0.03 ± 0.01	0.30 ± 0.08	4.10 ± 1.0	18.42 ± 2.1	11951.71 ± 3034.9
	t3_WS1	15969.73 ± 11829.3	441808.11 ± 22245.2	488.33 ± 56.1	4.03 ± 1.2	7.57 ± 0.5	646.11 ± 170.3	873.41 ± 80.8	549.71 ± 75.8	8485.42 ± 718.1	0.11 ± 0.03	7.04 ± 0.7	34.05 ± 7.1	0.07 ± 0.02	0.26 ± 0.08	3.12 ± 0.6	12.18 ± 2.5	10022.13 ± 1706.6526
	t3_WS1+2	10847.85 ± 2622.3	453248.54 ± 4103.5	300.92 ± 31.7	5.64 ± 2.8	8.31 ± 1.1	713.62 ± 368.1	1322.89 ± 646.6	865.44 ± 244.5	8069.71 ± 1753.5	0.11 ± 0.02	9.22 ± 2.7	36.07 ± 5.2	0.07 ± 0.02	0.35 ± 0.1	7.31 ± 9.4	17.28 ± 8.8	16056.15 ± 7910.0
	t3_WSc	7406.27 ± 508.7	447663.35 ± 3485.4	243.47 ± 42.3	4.77 ± 0.9	9.69 ± 0.2	797.84 ± 111.2	666.54 ± 84.5	570.00 ± 44.8	8869.15 ± 242.5	0.12 ± 0.08	9.66 ± 0.7	60.35 ± 26.06	0.07 ± 0.01	N	3.13 ± 0.4	20.01 ± 1.4	17127.40 ± 946.4
	t3_WS2	17204.56 ± 9763.5	446756.44 ± 19306.3	352.64 ± 85.2	4.08 ± 1.0	8.69 ± 0.5	827.77 ± 246.4	1408.14 ± 571.7	622.08 ± 192.0	7863.72 ± 967.6	0.10 ± 0.02	9.71 ± 1.4	41.84 ± 10.6	0.04 ± 0.01	0.55 ± 0.4	3.50 ± 1.1	16.89 ± 5.6	16109.13 ± 5846.1
ROOT	t1_WWc	32331.11 ± 7961.9	408578.44 ± 30820.8	1688.05 ± 153.9	2.11 ± 0.4	15.88 ± 1.0	1916.50 ± 515.7	2595.90 ± 593.8	5413.00 ± 1928.9	9721.68 ± 1224.0	8.52 ± 2.6	57.03 ± 17.5	1384.74 ± 534.4	1.69 ± 0.5	3.43 ± 1.3	53.50 ± 1.3	158.59 ± 63.7	24132.03 ± 10066.0
	t1_WS1+2	25527.06 ± 3302.2	455020.19 ± 13844.6	3224.46 ± 844.7	4.08 ± 0.6	15.25 ± 1.1	2844.31 ± 478.4	2258.36 ± 295.9	6096.08 ± 1558.4	7797.71 ± 185.9	18.36 ± 3.8	99.97 ± 7.1	3692.63 ± 836.6	2.05 ± 0.2	5.84 ± 1.3	34.93 ± 13.13	123.05 ± 38.8	29076.41 ± 8800.1
	t2_WWc	30498.87 ± 4880.0	457760.18 ± 24640.2	1017.53 ± 442.9	1.38 ± 0.2	16.00 ± 1.5	860.41 ± 422.5	2563.99 ± 754.7	1787.46 ± 281.9	11477.14 ± 1887.9	8.99 ± 2.2	64.50 ± 23.0	1375.19 ± 600.0	1.65 ± 0.4	3.42 ± 1.1	52.01 ± 28.2	159.52 ± 102.7	4482.11 ± 2506.7
	t2_WS1+2	28675.14 ± 745.9	449354.72 ± 8481.1	1481.33 ± 444.2	2.96 ± 0.9	16.36 ± 1.7	1475.28 ± 364.9	2087.94 ± 497.4	3997.56 ± 1400.7	10105.75 ± 1470.6	13.19 ± 4.9	121.88 ± 27.3	2505.50 ± 985.6	2.60 ± 0.6	4.51 ± 1.4	43.87 ± 24.0	152.66 ± 68.5	17623.70 ± 8236.2
	t2_WSc	30424.24 ± 9280.0	413515.72 ± 32099.9	3114.25 ± 733.3	3.81 ± 1.5	15.66 ± 1.7	2102.63 ± 275.0	1681.18 ± 170.5	3121.55 ± 624.7	9072.73 ± 1655.9	16.72 ± 6.6	96.16 ± 30.43	3168.09 ± 1413.4	2.25 ± 0.7	5.49 ± 1.7	32.25 ± 15.9	158.60 ± 74.0	19049.93 ± 4226.5
	t3_WWc	28116.72 ± 2600.8	449678.33 ± 16279.9	410.61 ± 214.6	1.47 ± 0.7	15.50 ± 1.4	557.73 ± 90.0	2032.50 ± 136.8	1289.62 ± 119.8	13773.18 ± 1215.3	14.52 ± 3.9	74.72 ± 11.5	2801.92 ± 926.0	2.04 ± 0.3	4.84 ± 1.5	49.47 ± 14.4	167.77 ± 23.1	1482.36 ± 260.4
	t3_WS1	33769.21 ± 7506.6	423515.06 ± 30961.1	653.01 ± 425.7	2.95 ± 1.6	12.27 ± 1.1	834.33 ± 193.4	1686.60 ± 281.3	1306.68 ± 250.3	12623.60 ± 2067.0	22.47 ± 3.4	91.20 ± 20.4	4871.53 ± 342.1	2.46 ± 0.2	7.07 ± 0.3	46.45 ± 21.7	152.57 ± 54.0	2631.71 ± 1306.7
	t3_WS1+2	27966.65 ± 1097.5	433390.47 ± 13756.0	474.67 ± 331.2	2.00 ± 0.8	13.84 ± 1.4	886.12 ± 71.2	1656.75 ± 173.3	1432.47 ± 361.9	9582.40 ± 936.7	27.17 ± 6.6	119.71 ± 22.4	5716.59 ± 1356.9	2.36 ± 0.38	7.93 ± 2.14	31.11 ± 123.20	123.20 ± 38.7	3242.08 ± 1550.1
	t3_WSc	26071.82 ± 2094.8	452472.69 ± 11910.4	832.03 ± 950.8	1.00 ± 0.2	17.50 ± 0.9	1067.47 ± 872.4	1313.45 ± 100.6	1846.95 ± 1553.1	12152.34 ± 1691.4	15.91 ± 3.7	77.77 ± 32.8	3391.50 ± 825.0	1.75 ± 0.3	4.64 ± 0.6	36.47 ± 19.9	154.57 ± 46.7	5160.30 ± 7817.6
	t3_WS2	32316.97 ± 5788.7	434245.45 ± 40330.9	997.41 ± 1025.6	1.01 ± 0.3	15.01 ± 2.4	838.89 ± 192.0	1766.00 ± 247.3	1462.15 ± 360.9	9578.30 ± 849.5	16.28 ± 5.3	60.22 ± 16.3	3311.93 ± 1357.8	1.51 ± 0.3	4.47 ± 1.4	21.59 ± 6.3	94.18 ± 35.9	3439.14 ± 2964.2
NODULE	t1_WWc	64859.67 ± 3556.8	458129.27 ± 23741.0	255.55 ± 98.8	35.08 ± 8.4	10.12 ± 0.6	1556.88 ± 158.2	5024.52 ± 342.2	3575.87 ± 514.7	5074.94 ± 797.6	4.70 ± 1.5	23.68 ± 3.5	1147.24 ± 359.5	0.67 ± 0.2	2.64 ± 0.5	23.52 ± 8.8	80.01 ± 12.9	19740.91 ± 3757.2
	t1_WS1+2	23544.09 ± 9103.2	503416.85 ± 23951.4	246.94 ± 89.0	24.82 ± 6.3	13.28 ± 1.7	1741.30 ± 96.9	4953.99 ± 449.2	3908.38 ± 358.9	4956.31 ± 316.9	5.08 ± 1.7	32.60 ± 6.9	1914.20 ± 1072.1	0.93 ± 0.4	5.97 ± 2.5	19.47 ± 4.3	92.26 ± 7.9	20330.43 ± 3521.3
	t2_WWc	51634.91 ± 13511.5	497177.69 ± 14539.6	320.79 ± 106.8	15.43 ± 3.3	9.11 ± 1.1	1256.47 ± 632.2	3905.63 ± 972.3	2683.23 ± 489.8	5263.30 ± 1487.3	4.66 ± 2.9	28.86 ± 8.1	969.32 ± 574.1	0.39 ± 0.1	1.45 ± 0.6	15.31 ± 7.4	41.31 ± 11.3	9232.79 ± 5939.6
	t2_WS1+2	46568.95 ± 7189.1	502064.87 ± 7362.6	129.97 ± 32.7	22.99 ± 6.6	7.51 ± 0.7	1182.76 ± 287.4	3349.39 ± 297.2	2670.79 ± 261.3	4106.74 ± 1083.6	2.37 ± 1.27	27.59 ± 16.1	1025.05 ± 1102.9	0.71 ± 0.4	1.55 ± 0.5	13.91 ± 3.1	40.64 ± 4.7	13127.75 ± 5454.1
	t2_WSc	53483.78 ± 5455.4	479306.11 ± 10782.0	259.41 ± 45.1	13.45 ± 3.3	9.91 ± 1.7	1610.73 ± 290.4	3237.33 ± 361.8	2454.16 ± 256.2	4135.03 ± 364.6	2.50 ± 1.6	22.41 ± 5.1	843.51 ± 364.4	0.59 ± 0.3	3.38 ± 0.8	13.77 ± 3.3	56.15 ± 10.5	16500.87 ± 5320.7
	t3_WWc	37359.53 ± 16753.3	485604.29 ± 33107.9	199.94 ± 25.7	6.55 ± 1.4	7.39 ± 0.7	699.61 ± 162.9	2183.53 ± 317.8	1462.72 ± 223.4	4761.88 ± 593.0	8.28 ± 4.2	49.52 ± 25.4	2038.36 ± 1156.8	0.94 ± 0.5	4.15 ± 2.0	9.56 ± 2.1	28.72 ± 3.6	1868.91 ± 525.7
	t3_WS1	35833.22 ± 10981.0	400029.16 ± 90255.2	291.82 ± 102.7	5.89 ± 1.8	6.66 ± 1.0	910.56 ± 361.4	1813.38 ± 442.0	1329.06 ± 356.4	3818.79 ± 763.2	16.43 ± 8.8	88.75 ± 49.4	4005.59 ± 2123.3	1.54 ± 0.9	5.62 ± 2.9	8.31 ± 1.5	36.15 ± 11.7	3335.2 ± 2508.8
	t3_WS1+2	36181.52 ± 8770.4	489807.01 ± 15728.6	1349.15 ± 225.4	19.62 ± 2.5	26.54 ± 3.5	2803.83 ± 438.1	6343.69 ± 918.4	5192.64 ± 705.5	17371.81 ± 2254.7	29.12 ± 4.8	131.93 ± 21.3	7987.60 ± 121.9	3.49 ±5.2	17.95 ± 2.3	35.15 ±4.8	104.46 ± 14.9	15665.81 ± 2176.1
	t3_WSc	37035.28 ± 5377.7	489989.49 ± 26767.4	255.36 ± 65.9	4.83 ± 2.7	8.46 ± 0.8	1033.41 ± 309.07	1995.13 ± 162.7	1672.94 ± 181.7	5066.42 ± 1444.4	2.45 ± 1.2	20.71 ± 6.1	1104.89 ± 987.9	0.67 ± 0.6	3.77 ± 5.4	30.90 ± 4.1	44.22 ± 29.1	6379.60 ± 6457.2
	t3_WS2	32335.18 ± 8487.3	500658.51 ± 13650.2	315.00 ± 159.4	5.58 ± 2.3	9.30 ± 2.4	642.48 ± 338.4	1884.69 ± 551.2	1443.85 ± 448.4	5456.79 ± 1986.5	3.94 ± 1.7	21.31 ± 7.2	1115.10 ± 346.1	0.46 ± 0.1	2.77 ± 1.3	8.18 ± 1.2	21.97 ± 5.1	4749.48 ± 5626.3

## Sheet: Supplementary Table 4
Supplementary Table S4 : Elements and Water Uptake/Use efficiencies according to the water stress considered and control.
RESULTS OF STATISTICAL ANALYSES									Conditions
mean ± sd and letter	Mean and standard deviation of sample and statistical difference compared with WW plants (letter)
									10 samplings:
									t1_WWc	Well watered at t1
Variables									t2_WWc	Well watered at t2
									t3_WWc	Well watered at t3
NUpE	Nitrogen Uptake Effieciency (mg/g)			NUE	Nitrogen UseEffieciency (mg/g)				t1_WS1	Vegetative stress at t1
CaUpE	Calcium Uptake Efficiency (mg/g)			CaUE	Calcium UseEfficiency (mg/g)				t2_WS1	Recovery period at t2
MgUpE	Magnesium Uptake Efficiency (mg/g)			MgUE	Magnesium UseEfficiency (mg/g)				t3_WS1	Vegetative Transient stress at t3
BUpE	Bore Uptake Efficiency (mg/g)			BUE	Bore UseEfficiency (mg/g)				t3_WS1+2	Recurrent stress at t3
KUpE	Potassium Uptake Efficiency (mg/g)			KUE	Potassium UseEfficiency (mg/g)				t2_WSc	Continuous stress at t2
PUpE	Phophorus Uptake Efficiency (mg/g)			PUE	Phophorus UseEfficiency (mg/g)				t3_WSc	Continuous stress at t3
NaUpE	Sodium Uptake Efficiency (mg/g)			NaUE	Sodium UseEfficiency (mg/g)				t3_WS2	Reproductive Transient stress at t3
ZnUpE	Zinc Uptake Efficiency (mg/g)			ZnUE	Zinc UseEfficiency (mg/g)
FeUpE	Iron Uptake Efficiency (mg/g)			FeUE	Iron UseEfficiency (mg/g)
MnUpE	Manganese Uptake Efficiency (mg/g)			MnUE	Manganese UseEfficiency (mg/g)
VUpE	Vanadium Uptake Efficiency (mg/g)			VUE	Vanadium UseEfficiency (mg/g)
CuUpE	Copper Uptake Efficiency (mg/g)			CuUE	Copper UseEfficiency (mg/g)
SUpE	Sulphur Uptake Efficiency (mg/g)			SUE	Sulphur UseEfficiency (mg/g)
CoUpE	Cobalt Uptake Efficiency (mg/g)			CoUE	Cobalt UseEfficiency (mg/g)
MoUpE	Molybdenum Uptake Efficiency (mg/g)			MoUE	Molybdenum UseEfficiency (mg/g)
NiUpE	Nickel Uptake Efficiency (mg/g)			NiUE	Nickel UseEfficiency (mg/g)
WUpE	Water Uptake Efficiency (m3/g)			WUE	Water UseEfficiency (m3/g)
	Harvest_Treament	N	Na	Mo	B	Mg	P	S	Ca	V	Mn	Fe	Co	Ni	Cu	Zn	K	W
UpE	t1_WWc	1.40 ± 0.1	1.20 ± 0.1	1.21 ± 0.1	1.16 ± 0.06	1.14 ± 0.04	1.18 ± 0.60	1.17 ± 0.06	1.27 ± 0.05	1.18 ± 0.05	1.16 ± 0.06	1.20 ± 0.09	1.16 ± 0.06	1.16 ± 0.06	1.16 ± 0.06	1.16 ± 0.06	1.31 ± 0.05	9.00 ± 1.1
	t1_WS1+2	1.32 ± 0.04	1.16 ± 0.06	1.16 ± 0.07	1.17 ± 0.06	1.16 ± 0.04	1.18 ± 0.06	1.17 ± 0.06	1.27 ± 0.05	1.18 ± 0.05	1.18 ± 0.05	1.16 ± 0.05	1.16 ± 0.06	1.21 ± 0.1	1.21 ± 0.1	1.33 ± 0.1	58.29 ± 6.6	6.15 ± 1.1
	t2_WWc	2.97 ± 0.8	1.10 ± 0.09	1.08 ± 0.09	1.11 ± 0.08	1.13 ± 0.09	1.27 ± 0.09	1.13 ± 0.09	1.60 ± 0.2	1.13 ± 0.04	1.09 ± 0.09	1.10 ± 0.09	1.08 ± 0.09	1.09 ± 0.09	1.09 ± 0.09	1.09 ± 0.09	1.98 ± 0.4	74.81 ± 6.9
	t2_WS1+2	1.88 ± 0.4	0.92 ± 0.1	0.81 ± 0.1	0.66 ± 0.22	0.83 ± 0.2	0.83 ± 0.1	0.91 ± 0.11	0.88 ± 0.1	1.28 ± 0.1	0.82 ± 0.1	0.82 ± 0.1	0.81 ± 00.1	0.82 ± 0.1	0.81 ± 0.1	0.81 ± 0.1	1.26 ± 0.37	80.67 ± 12.1
	t2_WSc	2.62 ± 0.3	1.25 ± 0.33	1.24 ± 0.3	1.21 ± 0.3	1.04 ± 0.1	1.30 ± 0.3	1.27 ± 0.3	1.71 ± 0.36	1.03 ± 0.1	1.03 ± 0.1	1.24 ± 0.3	1.03 ± 0.1	1.24 ± 0.3	1.23 ± 0.3	.23 ± 0.3	1.53 ± 0.1	73.75 ± 11.1
	t3_WWc	6.94 ± 1.6	0.66 ± 0.3	0.70 ± 0.25	0.74 ± 0.3	0.95 ± 0.2	1.11 ± 0.2	0.76 ± 0.3	2.46 ± 0.4	0.64 ± 0.3	0.70 ± 0.2	0.70 ± 0.2	0.70 ± 0.2	0.7 ± 0.2	0.79 ± 0.2	0.79 ± 0.2	2.59 ± 0.5	53.05 ± 19.2
	t3_WS1	3.70 ± 1.7	1.04 ± 0.4	0.96 ± 0.4	0.67 ± 0.5	1.03 ± 0.4	0.80 ± 0.5	1.04 ± 0.4	1.02 ± 0.7	1.11 ± 0.4	0.96 ± 0.4	1.16 ± 0.4	0.96 ± 0.4	0.92 ± 0.4	0.92 ± 0.4	0.83 ± 0.53	1.26 ± 0.57	37.40 ± 9.7
	t3_WS1+2	0.72 ± 0.33	0.58 ± 0.48	0.58 ± 0.5	0.44 ± 0.4	0.45 ± 04	0.48 ± 0.4	0.45 ± 0.4	0.54 ± 0.5	0.44 ± 0.4	0.44 ± 0.4	0.48 ± 0.4	0.44 ± 0.4	0.44 ± 0.4	0.44 ± 0.4	0.44 ± 0.4	0.78 ± 0.5	11.93 ± 6.2
	t3_WSc	0.39 ± 0.32	1.01 ± 0.4	0.87 ± 0.6	1.04 ± 0.5	0.76 ± 0.64	0.87 ± 0.61	1.04 ± 0.47	0.95 ± 0.72	0.47 ± 0.28	0.87 ± 0.6	0.37 ± 0.3	1.04 ± 0.5	0.42 ± 0.4	1.04 ± 0.37	1.04 ± 0.46	0.86 ± 0.7	12.73 ± 6.4
	t3_WS2	2.77 ± 0.9	0.49 ± 0.04	0.37 ± 0.2	0.32 ± 0.2	0.40 ± 0.2	0.35 ± 0.2	0.52 ± 0.07	0.93 ± 0.3	0.48 ± 0.04	0.48 ± 0.04	0.51 ± 0.04	0.48 ± 0.04	0.48 ± 0.04	0.48 ± 0.04	0.48 ± 0.04	1.05 ± 0.5	10.92 ± 4.77
UE	t1_WWc	0.04 ± 0.006	36.93 ± 62.9	187.71 ± 28.1	53.44 ± 3.0	0.76 ± 0.06	0.37 ± 0.02	0.46 ± 0.08	0.06 ± 0.003	2463.94 ± 327.4	38.34 ± 7.8	9.97 ± 4.6	3672.65 ± 1409.4	4919.64 ± 3407.3	57.73 ± 3.7	18.11 ± 4.2	0.04 ± 0.004	0.0009 ± 0.0002
	t1_WS1+2	0.05 ± 0.003	2.58 ± 1.5	212.73 ± 64.7	56046 ± 5.1	0.59 ± 0.04	0.37 ± 0.05	0.43 ± 0.06	0.07 ± 0.004	283.92 ± 78.5	1841 ± 1.4	1.35 ± 0.5	1899.66 ± 301.7	965.2 ± 735.2	78.83 ± 10.6	18.40 ± 1.4	0.04 ± 0.006	0.001 ± 0.0005
	t2_WWc	0.04 ± 0.011	4.30 ± 1.3	550.51 ± 295.9	57.36 ± 6.7	1.31 ± 0.31	0.43 ± 0.07	1.57 ± 0.8	0.12 ± 0.03	1274.04 ± 625.1	42.93 ± 8.02	5.83 ± 4.1	8297.48 ± 5915.2	1713.10 ± 1443.1	207.23 ± 203.9	58.60 ± 34.89	0.09 ± 0.03	0.0007 ± 8.1.10-5
	t2_WS1+2	0.04 ± 0.004	13.09 ± 10.4	334.22 ± 192.7	61.69 ± 2.5	1.51 ± 0.2	0.54 ± 0.1	0.95 ± 0.2	0.09 ± 0.006	3562.56 ± 2034.1	35.15 ± 3.3	19.75 ± 16.5	4668.51 ± 2446.9	3108.5 ± 2022.8	141.70 ± 56.9	50.98 ± 29.7	0.08 ± 0.02	0.001 ± 0.001
	t2_WSc	0.04 ± 0.006	3.03 ± 1.2	805.47 ± 454.70	66.22 ± 4.7	1.46 ± 0.2	0.84 ± 0.2	1.66 ± 0.3	0.10 ± 0.004	1270.77 ± 418.6	42.97 ± 10.98	4.44 ± 3.3	8650.28 ± 4442.9	1690.31 ± 989.3	81.19 ± 70.5	26.8 ± 10.3	0.09 ± 0.01	0.001 ± 0.001
	t3_WWc	0.05 ± 0.009	18.61 ± 12.9	1344.49 ± 563.60	87.64 ± 25.69	1.40 ± 0.2	0.64 ± 0.07	1.82 ± 0.5	0.13 ± 0.04	1603.77 ± 962.0	72.80 ± 17.4	7.37 ± 3.2	9225.83 ± 2907.8	1856.94 ± 844.7	147.68 ± 47.7	51.68 ± 12.5	0.13 ± 0.03	0.02 ± 0.007
	t3_WS1	0.05 ± 0.007	10.72 ± 3.5	1630.63 ± 1022.6	121.87 ± 9.7	2.37 ± 0.6	0.99 ± 0.3	2.25 ± 0.7	0.24 ± 0.02	559.87 ± 146.5	118.83 ± 111.2	2.45 ± 0.7	8053.36 ± 4755.6	1322.53 ± 473.1	334.38 ± 170.4	160.50 ± 179.8	0.61 ± 0.9	0.008 ± 0.007
	t3_WS1+2	0.09 ± 0.06	19.60 ± 12.3	438.23 ± 237.8	290.61 ± 246.4	2.51 ± 1.41	0.93 ± 0.72	4.42 ± 3.9	0.34 ± 0.3	193.34 ± 146.2	40.0 ± 32.8	0.98 ± 0.8	5506.75 ± 8138.4	497.7 ± 351.9	128.5 ± 176.8	41.8 ± 39.8	0.23 ± 0.09	0.001 ± 0.0006
	t3_WSc	0.18 ± 0.2	0.54 ± 0.3	1128.67 ± 1307.4	80.16 ± 43.1	2.40 ± 0.5	1.65 ± 1.4	5.75 ± 5.0	0.25 ± 0.1	492.3 ± 301.9	87.54 ± 56.9	1.54 ± 0.8	14156.98 ± 15180.4	3114.43 ± 3766	39.63 ± 41.08	52.83 ± 53.65	0.30 ± 0.1	0.002 ± 0.001
	t3_WS2	0.11 ± 0.1	29.55 ± 34.4	10292.36 ± 10140	152.51 ± 63.1	2.81 ± 1.50	1.36 ± 0.8	3.05 ± 2.4	0.36 ± 0.2	617.91 ± 364.0	101.8 ± 69.4	3.33 ± 3.4	9513.06 ± 4598.6	1284.6 ± 741.9	391.53	82.32 ± 57.0	0.14 ± 0.06	0.001 ± 0.0005
